# Supplementary material for: An excellent sensible heat storage and photothermal conversion pyrite waste material for pollutant removal
Source: Royal Society of Chemistry journal article supplement (doi:10.1039/d3nj01353g), 2023-01-01
Supplement: d3nj01353g1.pdf [file d3nj01353g1.pdf]

## **Supplementary information**

### **An excellent sensible heat storage and photothermal conversion pyrite waste material for pollutant removal**

Qian Zhang <sup>a, b</sup>, Dan Zheng <sup>a, b</sup>, Bo Bai <sup>\*, a, b</sup>, Meng Mei <sup>a, b</sup>, Feiying Yang <sup>c</sup>

<sup>a</sup> Key Laboratory of Subsurface Hydrology and Ecological Effects in Arid Region of the  
Ministry of Education, Chang'an University, Xi'an 710054, P.R. China

<sup>b</sup> School of Water and Environment, Chang'an University, Xi'an, 710054, P.R. China

<sup>c</sup> SINO Shaanxi Nuclear Industry Comprehensive Analysis Testing CO., LTD., Xi'an,  
Shaanxi 710024, PR China

\* Corresponding author

E-mail address: [baibochina@163.com](mailto:baibochina@163.com)

## Text S1

**Materials.** All the chemical reagents employed in this investigation are of analytical grade and without further purification before use. Nitric acid ( $\text{HNO}_3$ ), hydrochloric acid ( $\text{HCl}$ ), and OFX were commercially available from Shanghai Maclean Biochemical Technology Co., Ltd. Ethanol and hydrogen peroxide ( $\text{H}_2\text{O}_2$ , 35%) were supplied by Shanghai Aladdin Biochemical Technology Co., Ltd. Methylene blue (MB), methyl orange (MO), rhodamine B (RhB), tetracycline hydrochloride (TC), norfloxacin (NOR) and metronidazole (MNZ) were purchased from Sinopharm chemical reagent Co., Ltd. The natural pyrite waste was derived from mine waste in Baihe of Shaanxi, China.

## Text S2

**Characterization.** The crystal structure of the material was examined on the X-ray diffractometer (D8 ADVANCE) operated under a voltage of 40 kV and a current of 40 mA by using the  $\text{Cu K}\alpha$  radiation over an angular range of  $5\text{--}80^\circ$  ( $2\theta$ ). in the  $2\theta$  scan range of  $5\text{--}80^\circ$ . The Fourier transform infrared spectroscopy (FTIR PerkinElmer Spectrum Two) was employed to ascertain the functional groups of material in the form of KBr discs over the range of 400 to  $4000\text{ cm}^{-1}$ . The morphologies of the material were observed by field emission scanning electron microscopy (SEM, Tescan Mira4). The X-ray spectrometer (EDX, Xplore30. Aztec one) was applied in conjunction with SEM to perform element analysis of the material. The optically absorbing property of the material was characterized by ultraviolet–visible near-infrared (UV–Vis-NIR) spectrophotometer (Agilent Cary 5000). The thermal stability of the material was examined on thermogravimetric analyze (TGA, STA449c/3/GA , Netzsch Inc., Germany) t from room temperature to  $1000\text{ }^\circ\text{C}$  at a heat ingrate of  $20\text{ }^\circ\text{C}/\text{min}$  under nitrogen airflow of  $80\text{ mL}/\text{min}$ . The thermal conductivity of the material was measured by the Hotdisk transient flat plate heat source method. The differential scanning calorimetry DSC (DSC-60PLUS) was applied to determine the specific heat capacity of the material. The measure was performed under the heating rate of  $10\text{ }^\circ\text{C}/\text{min}$  and nitrogen flow rate of  $50\text{ mL}/\text{min}$ , and the DSC curve of empty crucible and sapphire with known specific heat capacity were recorded as a baseline and standard calibration, respectively. Finally, the specific heat capacity of the material was calculated according to Eq. (1).

$$c_{p, \text{ sample}} = \frac{c_{p, \text{ sapphire}} \cdot m_{\text{ sapphire}}}{m_{\text{ sample}}} \times \frac{DSC_{\text{ sample}} - DSC_{\text{ baseline}}}{DSC_{\text{ sapphire}} - DSC_{\text{ baseline}}} \quad \#(1)$$

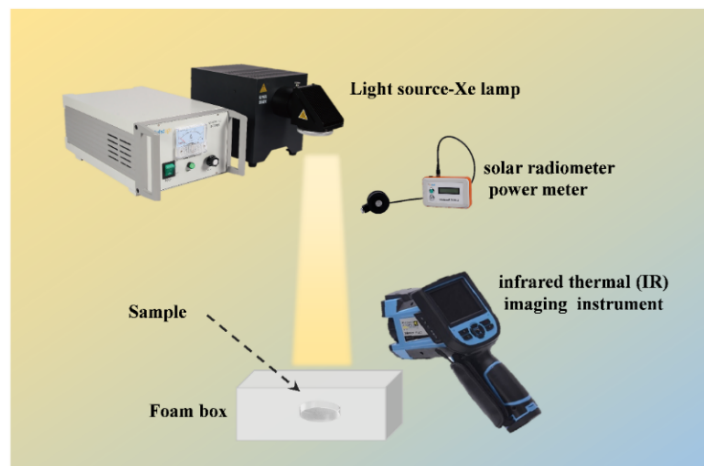

**Fig. S1.** The photothermal conversion test system

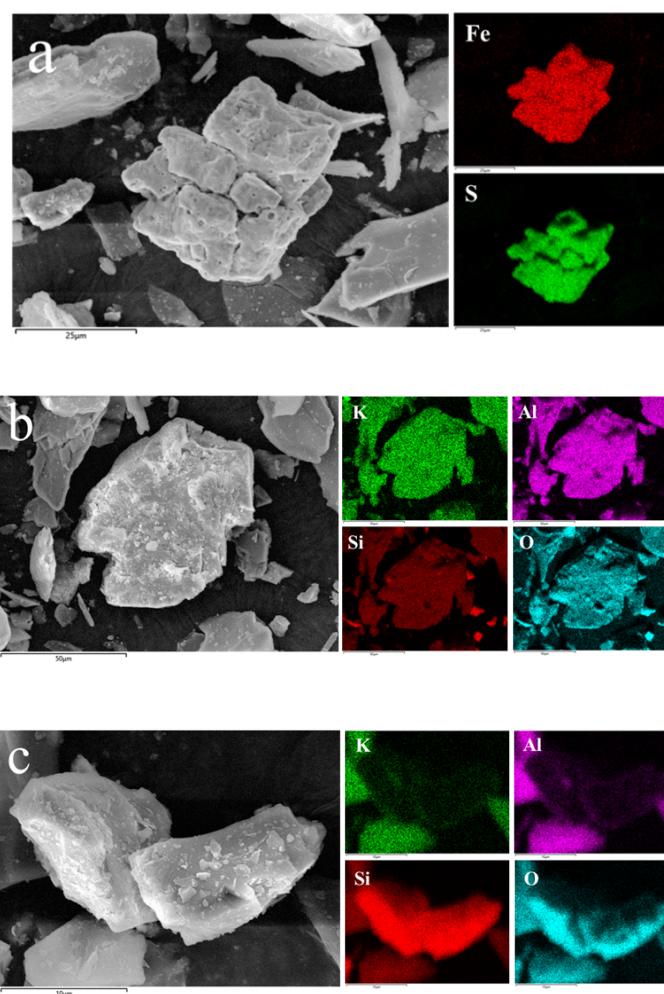

**Fig. S2.** SEM and corresponding EDS mapping of (a) pyrite, (b) muscovite, (c) quartz in pyrite waste

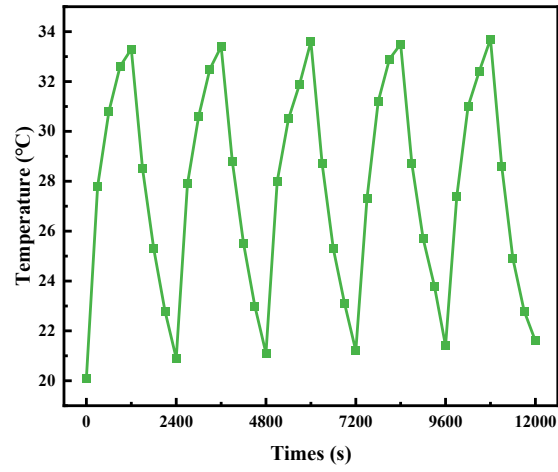

**Fig. S3.** The temperature change of pyrite waste solution under ON/OFF irradiation.

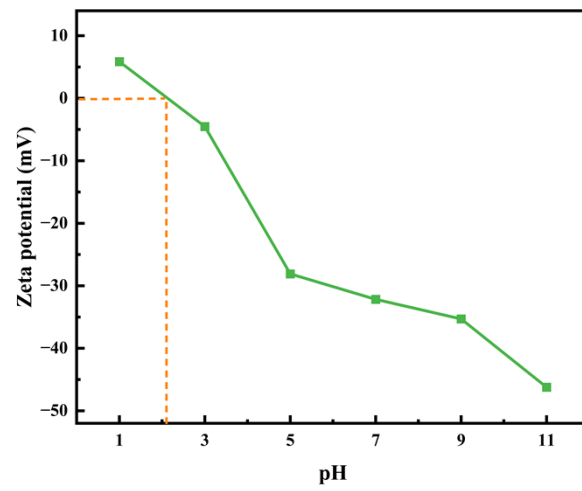

**Fig.S4** The zeta potential of pyrite waste under different pH
